# Supplementary material
Source: PubMed Central journal article supplement (PMC2917222)

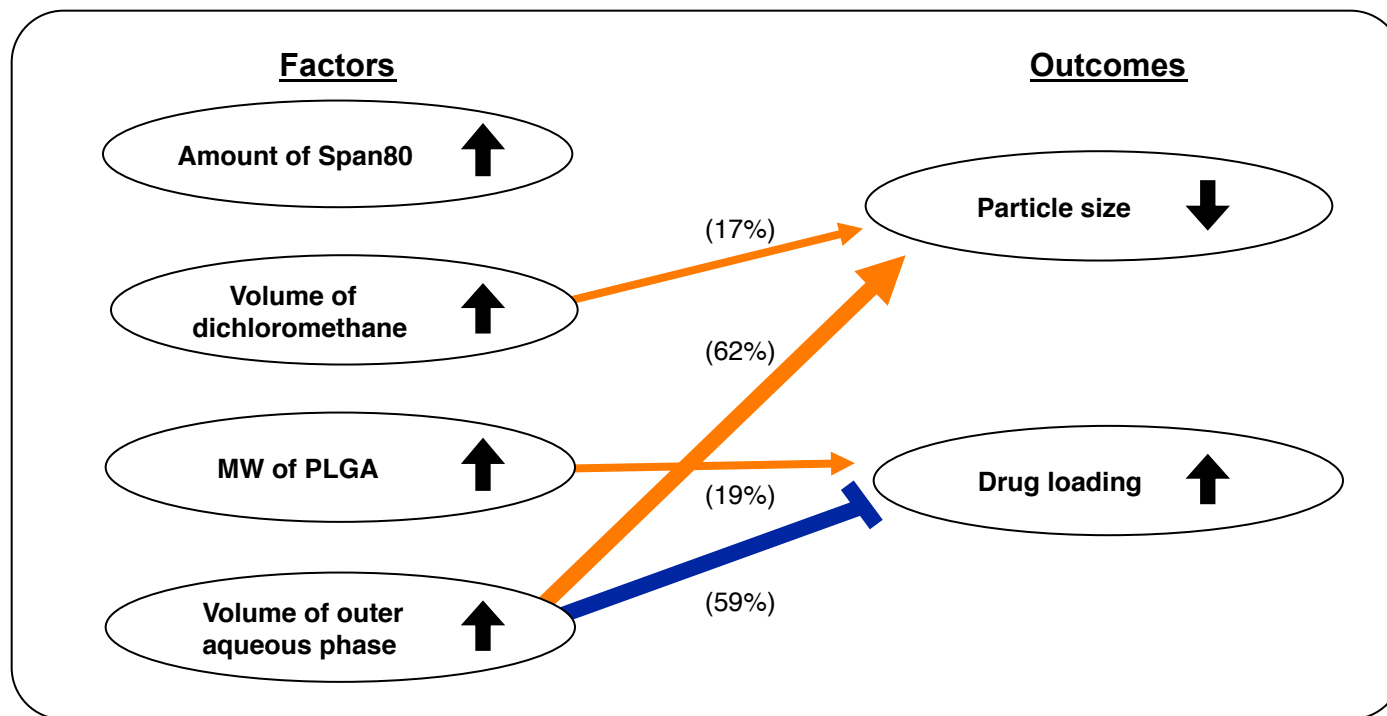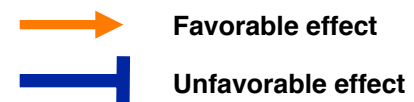

Supplement: NIHMS213867-supplement-01.pdf [file NIHMS213867-supplement-01.pdf]

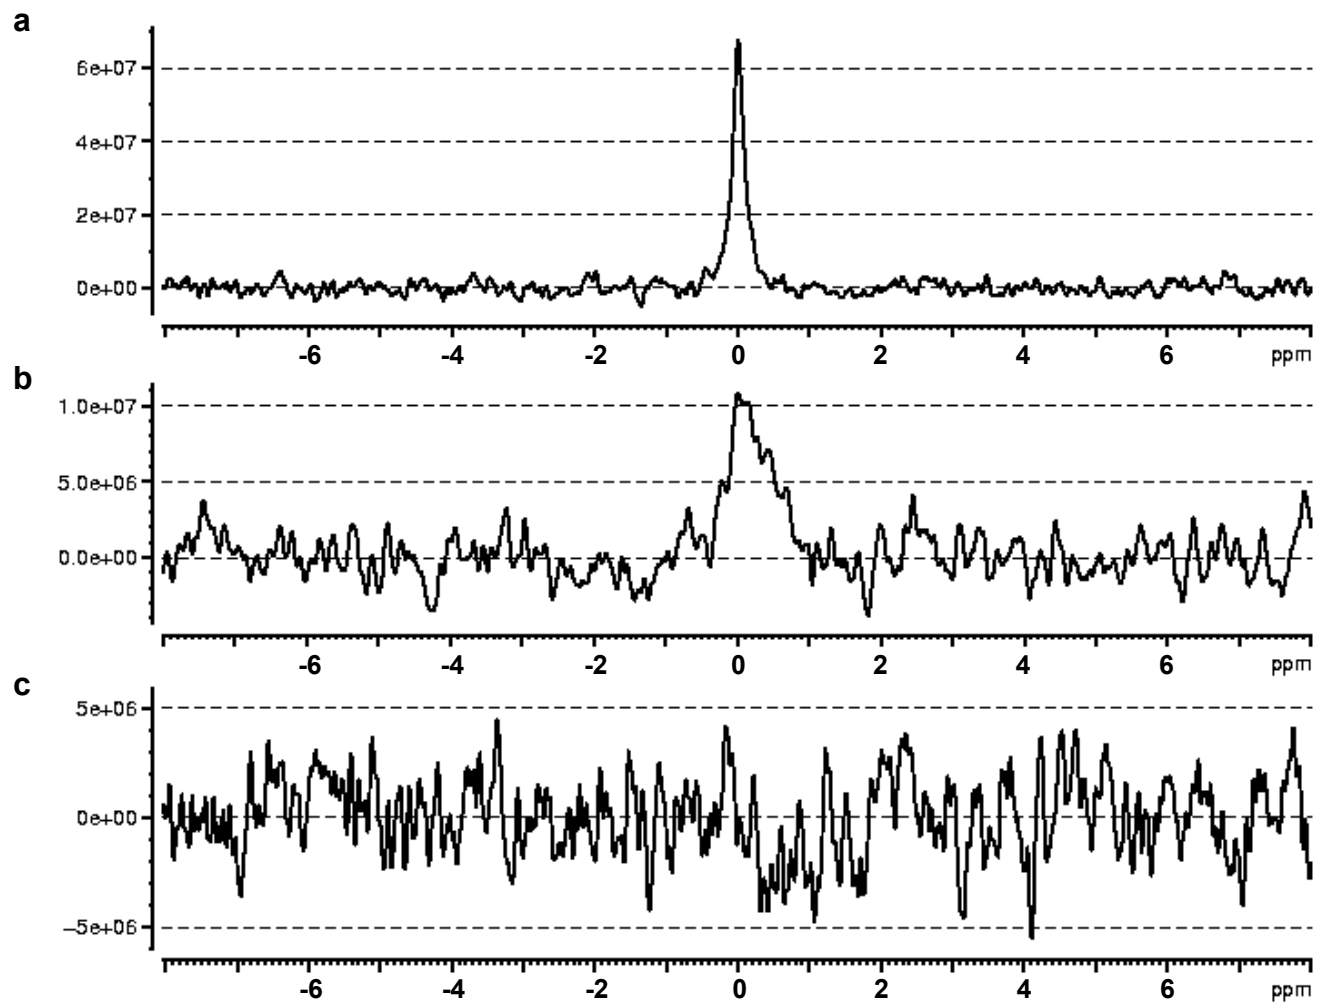

Supplement: NIHMS213867-supplement-02.pdf [file NIHMS213867-supplement-02.pdf]

Pre-contrast

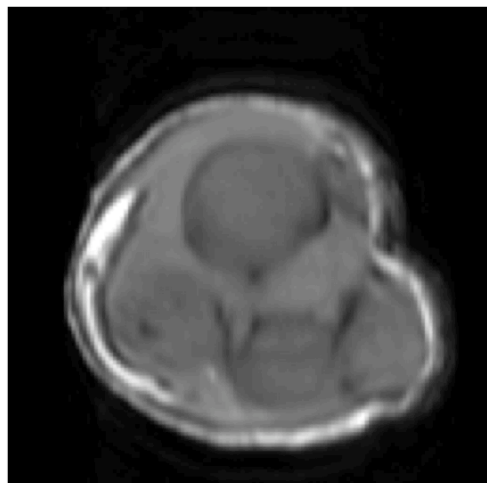

Post-contrast

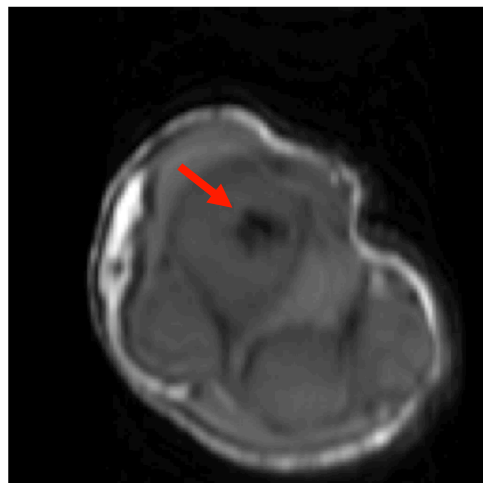

$T_1$  map

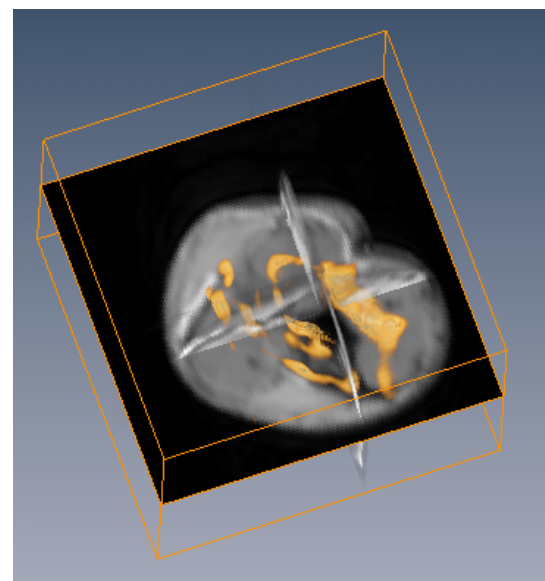

Supplement: NIHMS213867-supplement-03.pdf [file NIHMS213867-supplement-03.pdf]
